# Supplementary material for: An ancestral allele of grapevine transcription factor MYB14 promotes plant defence
Source: PubMed Central journal article supplement (PMC4783363; doi:10.1093/jxb/erv569), 2016-02-02
Supplement: supp_erv569_supplementary_figure_S1_table_S1.pdf [file supp_erv569_supplementary_figure_S1_table_S1.pdf]

**An ancestral allele of grapevine transcription factor *MYB14*  
promotes plant defence**

**Dong Duan, Sabine Fischer, Patrick Merz, Jochen Bogs, Michael Riemann, and  
Peter Nick**

**Figure S1.** The alignment and the significant differential *cis*-elements for the *MYB14* promoters of Hoe29 and Ke83, compared to Augster Weiss and the reference genome (from the *vinifera* cultivar Pinot Noir).

|               |                                                                    |     |
|---------------|--------------------------------------------------------------------|-----|
| Hoe29         | CTACTGACGTGCACTAGCCTCTTTCTTTGACCCCTTCACACCATCGATGCTAAATTCCAA       | 60  |
| Ke83          | CTACTGACGTGCACTAGCCTCTTTCTTTGACCCCTTCACACCATCGATGCTAAATTCCAA       | 60  |
| Augster Weiss | CTACTGACGTGCACTAGCCTCTTTCTTTGACCCCTTCACACCATCGATGCTAAATTCCAA       | 60  |
| Reference     | CTACTGACGTGCACTAGCCTCTTTCTTTGACCCCTTCACACCATCGATGCTAAATTCCAA       | 60  |
|               | *****                                                              |     |
| Hoe29         | GCAGCCAAATACTTCAACAAATGTGAAGTGCACGTGTACACTCTCACACTCGTGTCCAT        | 120 |
| Ke83          | GCAGCCAAATACTTCAACAAATGTGAAGTGCACGTGTACACTCTCACACTCGTGTCCAT        | 120 |
| Augster Weiss | GCAGCCAAATACTTCAACAAATGTGAAGTGCACGTGTACACTCTCACACTCGTGTCCAT        | 120 |
| Reference     | GCAGCCAAATACTTCAACAAATGTGAAGTGCACGTGTACACTCTCACACTCGTGTCCAT        | 120 |
|               | *****                                                              |     |
| Hoe29         | TTTGTGAATATGGTATTAGGTGTTGTTAGGGTCTAATTTTGGGTCGAGTTAAGAGAAC         | 180 |
| Ke83          | TTTGTGAATATGCTA <b>TTAGGT</b> TGTTAGGGTCTAATTTTGGGTCGAGTTAAGAGAAC  | 180 |
|               | <i>MRE</i>                                                         |     |
| Augster Weiss | TTTGTGAATATGGTATTAGGTGTTGTTAGGGTCTAATTTTGGGTCGAGTTAAGAGAAC         | 180 |
| Reference     | TTTGTGAATATGGTATTAGGTGTTGTTAGGGTCTAATTTTGGGTCGAGTTAAGAGAAC         | 180 |
|               | *****                                                              |     |
| Hoe29         | ACTTATTCATCATACTTTAGCTGGATATGGAAAGTTTTTGAATATGTAATGAAGAAAAGG       | 240 |
| Ke83          | ACTTATTCATCATACTTTAGCTGGATATGGAAAGTTTTTGAATATGTAATGAAGAAAAGG       | 240 |
| Augster Weiss | ACTTATTCATCATACTTTAGCTGGATATGGAAAGTTTTTGAATATGTAATGAAGAAAAGG       | 240 |
| Reference     | ACTTATTCATCATACTTTAGCTGGATATGGAAAGTTTTTGAATATGTAATGAAGAAAAGG       | 240 |
|               | *****                                                              |     |
| Hoe29         | AAAGAAATTTATTTCAAATTCATCCATTAGTATTTTATAAATTTATTTTATTATTATA         | 300 |
| Ke83          | AAAGAAATTTATTTCAAATTCATCCATTAGTATTTTATAAATTTATTTTATTATTATA         | 300 |
| Augster Weiss | AAAGAAATTTATTTCAAATTCATCCATTAGTATTTTATAAATTTATTTT-----             | 291 |
| Reference     | AAAGAAATTTATTTCAAATTCATCCATTAGTATTTTATAAATTTATTTT-----             | 291 |
|               | *****                                                              |     |
| Hoe29         | ATTTATTTTTTTAAAGAGATTTAAATGAAAATATTTTAAAGTAGAA-----TCC             | 349 |
| Ke83          | ATTTATTTTTTT-AAAGAGATTTAAATGAAAATATTTTAAAGTAGAA-----TCC            | 348 |
| Augster Weiss | -----TTTAAAGAGATTTAAATGAAAATATTTTAAAGTAGAAGTGTTTAAAAATCC           | 341 |
| Reference     | -----TTTAAAGAGATTTAAATGAAAATATTTTAAAGTAGAAGTGTTTAAAAATCC           | 341 |
|               | ** *****                                                           | **  |
| Hoe29         | TCTAATAATTAATTTTATTCTTTAAAAATTAATTTATATATATAAAATATATTTATA          | 409 |
| Ke83          | TCTAATAATTAATTTTATTCTTTAAAAATTAATTTATATATATAAAATATATTTATA          | 408 |
| Augster Weiss | TCTAATAATTAATTTTATTCTTTAAAAATTAATTTATATATATAAAATATATTTATC          | 411 |
| Reference     | TCTAATAATTAATTTTATTCTTTAAAAATTAATTTATATATATAAAATATATTTATC          | 401 |
|               | *****                                                              |     |
| Hoe29         | GGATGTAACCGATAAAATTTGAAATATGTGGCGACTTTATATATTTACATTCAGGTGATG       | 469 |
| Ke83          | GGATGTAACCGATAAAATTTGAAATATGTGGCGACTTTATATATTTACATTCAGGTGATG       | 468 |
| Augster Weiss | GGATGTAACCGTAAATTTGAAATATGTGACGATTTTATATATTTACATTAGGGTGGTG         | 461 |
| Reference     | GGATGTAACCGTAAATTTGAAATATGTGACGATTTTATATATTTACATTAGGGTGGTG         | 461 |
|               | *****                                                              |     |
| Hoe29         | TTTATTTTGCATGGAATAGAAAAA-TCAAAATATTTGATTTTTTTAATT <b>CAATTAAA</b>  | 528 |
|               | <i>CAAT-box</i>                                                    |     |
| Ke83          | TTTATTTTTCGAT-----                                                 | 481 |
| Augster Weiss | TTTATTTTGGATTGAATAGAAAAAATTAATTTGATTTTCT-AATTTAACTAAA              | 520 |
| Reference     | TTTATTTTGGATTGAATAGAAAAA-TCAAAATATTTGATTTTCT-AATTTAACTAAA          | 519 |
|               | *****                                                              |     |
| Hoe29         | <b>AATAACTCTT</b> TGACATCGTTCAATATAACTAACTGAACAAATTTAATAGTTTATAGTT | 588 |
|               | <i>3-AF1 binding site</i>                                          |     |
| Ke83          | -----                                                              |     |
| Augster Weiss | AATAACTTGTTCACATCGTTCAATATAACTAACTGAATTTAATTAATAGATTCAATT          | 580 |
| Reference     | AATAACTTGTTCACATCGTTCAATATAACTAACTGAATTTAATTAATAGATTCAATT          | 579 |

Hoe29 CAATTATGTTGAAAAATATAAACATGTTACTTTTAAATGAATAAAAAAATCAAAATATTT 648  
CAAT-box CAAT-box CAAT-box

Ke83 -AATTATGTTGAAAAATATAAATATGTTACTTTTAACTGAATAAAAAAAGTCAAAATATTT 540  
as-2-box CAAT-box

Augster Weiss TAGTTATATTGAAGAAATATAAACGGATTACTTTTAACTGAATATAAAAAATTAAGTATTT 640  
Reference TAGTTATATTGAAGAAATATAAACGGATTACTTTTAACTGAATATAAAAAATTAAGTATTT 639  
\* \* \* \* \*

Hoe29 TAATTTTTTATATTCAATACAAAAACAACACCATTACATCTCAAGATTATCAATGAAA 708  
circadian

Ke83 TAATTTTTTATATTCAATACAAAAACAACATCATTTACAACCAAGATTATCAATGAAA 600  
circadian

Augster Weiss TAATTTTCATATTCAATAAAAAACAACATCACTTAAGATTCA-GATTATCAATGAAA 699  
Reference TAATTTTCATATTCAATAAAAAACAACATCACTTAAGATTCA-TATTATCAATGAAA 698  
\* \* \* \* \*

Hoe29 AACTCAAATTAATAATTTCTGCATATATTCTAATGCACCGCCTTAAGATGAGCCGGTT 768  
Ke83 AACTCAAATTAATAATTTCTGCATATATTCTAAAGCACCAGCCTTAAGATGAGCCGGTT 660  
Augster Weiss AACTCAAATTAATAATTTCTGCATATATTCTAAGCACCAGCCTTAAGATGAGCCGGTT 759  
Reference AACTCAAATTAATAATTTCTGCATATATTCTAAGCACCAGCCTTAAGATGAGCCGGTT 758  
\* \* \* \* \*

Hoe29 ATTCTATTAAGAGATAATAACGAATTTGAAAAGGCAGAAAAGGAAAATACCAAGAAGGA 828  
Ke83 ATTCTATTAAGAGATAATAACGAATTTGAAAAGGCAGAAAAGGAAAATACCAAGAAGGA 720  
Augster Weiss ATTCTATTAAGAGATAATAACGAATTTGAAAAGGCAGAAAAGGAAAATACCAAGAAGGA 819  
Reference ATTCTATTAAGAGATAATAACGAATTTGAAAAGGCAGAAAAGGAAAATACCAAGAAGGA 818  
\* \* \* \* \*

Hoe29 CTTGGGGATATTGAACGTCACATTCATAGGGATCGCCTTGCAGAAGAAAACAAAAACAAG 888  
Ke83 ATTGGGGATATTGAACGTCACATTCATAGGGATCGCCTTGCAGAAGAAAACAAAAACAAG 780  
Augster Weiss TTTGGGGATATTGAACGTCACATTCATAGGGATCACCTTGCAGAAGAAAACAAAAACAAG 879  
Reference TTTGGGGATATTGAACGTCACATTCATAGGGATCACCTTGCAGAAGAAAACAAAAACAAG 878  
\* \* \* \* \*

Hoe29 ATGAAATTCATCCGGGTAAGTTATTATATAGCAAGTTGGTGCCTTAATTTGCCAAAGTT 948  
Ke83 ATGAAATTCATCCGGGTAAGTTATTATATAGCAAGTTGGTGCCTTAATTTGCCAAAGTT 840  
Augster Weiss ATGAAATTCATCCGGGTAAGTTATTATATAGCAAGTTGGTGCCTTAATTTGCCAAAGTT 939  
Reference ATGAAATTCATCCGGGTAAGTTATTATATAGCAAGTTGGTGCCTTAATTTGCCAAAGTT 938  
\* \* \* \* \*

Hoe29 GGTCACAAGTTTCATTAATAATAATAATAATAATAATAATAAGGAAAGAAAGGAAA 1008  
Ke83 GGTCACAAGTTTTATTAAAATAATAATAATAATAATA-----GGAAAGAAAGGAAA 894  
Augster Weiss GGTCACAAGTTTCATTAATAATAATAATAATAATAATA-----GGAAAGAAAGGAAA 993  
Reference GGTCACAAGTTTCATTAATAATAATAATAATAATAATA-----GGAAAGAAAGGAAA 992  
\* \* \* \* \*

Hoe29 AGAAAAATCTTGAACCTCAAATGTAATAATCTGAACATGCCCAATTAATGGCCATGCT 1068  
Ke83 AGAAAAATCTTGAACCTCAAATGTAATAATCTGAACATGCCCAATTAATGGCCATG-T 953  
Augster Weiss AGAAAAATCTTGAACCTCAAATGTAATAATCTGAACATGCCCAATTAATGGCCATGCT 1053  
Reference AGAAAAATCTTGAACCTCAAATGTAATAATCTGAACATGCCCAATTAATGGCCATGCT 1052  
\* \* \* \* \*

Hoe29 AGTTCAAGGAAAAGAAAACCCACGTTTTATTGACCAATAAACAAACACTCGTGTGCAT 1128  
Ke83 AGTTCAAGGAAAAGAAAACCCACGTTTTATTGACCAATAAACAAACACTCGTGTGCAT 1013  
Augster Weiss AGTTCAAGGAAAAGAAAACCCACGTTTTATTGACCAATAAACAAACACTCGTGTGCAT 1113  
Reference AGTTCAAGGAAAAGAAAACCCACGTTTTATTGACCAATAAACAAACACTCGTGTGCAT 1112  
\* \* \* \* \*

Hoe29 CCAGTGAGGCGGTTCCCTAGCAATTGTGGGCTAAAAAGGATATGCCTTTTTATTTCCTTTT 1188  
Ke83 CCAGTGAGGCGGTTCCCTAGCAATTGTGGGCTAAAAAGGATATGCCTTTTTATTTCCTTTT 1073  
Augster Weiss CCAGTGAGGCGGTTCCCTAGCAATTGTGGGCTAAAAAGGATATGCCTTTTTATTTCCTTTT 1173  
Reference CCAGTGAGGCGGTTCCCTAGCAATTGTGGGCTAAAAAGGATATGCCTTTTTATTTCCTTTT 1172  
\* \* \* \* \*

Hoe29 TTTCTTCTTTTCTTAAATCTATCAACAGTTGTTTGCCTATCTGCAAATGCAGCAG 1248  
5'UTR Py-rich stretch GATA-motif

Ke83 TTT-----TCTAAATCTATCAACAGTTGTTTGTACTATCTGCAAATGCAGCAG 1123  
Augster Weiss TTT-----TCTAAATCTATCAACAGTTGTTTGTACTATCTGCAAATGCAGCAG 1223

```

Reference      TTT-----TCTAAATCTATCAACAGTTGTTTGTACTATCTGCAAATGCAGCAG 1222
                ***                               *****

Hoe29          CTGGACTCCTCATTATAAATACCCGCTCATGGGCTTCAAATCGGTTTGAGCTTGGGACAT 1308
Ke83           CTGGACAGC--ACTATAAATACCCGCTCATGGGCTTCAAATCGGTTTGAGCTTGGGACAT 1181
Augster Weiss  CTGGACTCCTCATTATAAATACCCGCTCATGGGCTTCAAATCGGTTTGAGCTTGGGACAT 1283
Reference      CTGGACTCCTCATTATAAATACCCGCTCATGGGCTTCAAATCGGTTTGAGCTTGGGACAT 1282
                ***** * * *****

Hoe29          CGACAGAGAACACAG-----TCTCAAATCCTTACATAGAGAAGA 1347
                TCA-element

Ke83           CAAGAGAGACCACAGAGATAAACCAAGGGTGTCTCAGTCTCAAATCCTTACATAGAAAAGA 1241
Augster Weiss  CAAGAGAGAACACAGAGATAAACCAAGGGTGTCTCAGTCTCAAATCCTTACGTAGAAAAGA 1343
Reference      CAAGAGAGAACACAGAGATAAACCAAGGGTGTCTCAGTCTCAAATCCTTACGTAGAAAAGA 1342
                * * ***** *****

Hoe29          AAAA 1351
Ke83           AAAA 1245
Augster Weiss  AAAA 1347
Reference      AAAA 1346
                ****

```

*CAAT box*: common *cis*-acting element in promoter and enhancer regions.

*circadian*: *cis*-acting regulatory element involved in circadian control.

### Ke83

*MRE*: *MYB* binding site involved in light responsiveness.

*as-2-box*: involved in shoot-specific expression and light responsiveness.

### Hoe29

*3-AF1 binding site*: light responsive element.

*5'UTR Py-rich stretch*: *cis*-acting element conferring high transcription levels.

*GATA-motif*: part of a light responsive element.

*TCA-element*: *cis*-acting element involved in salicylic acid responsiveness.

**Table S1.** Sequence of oligonucleotide primers for GATEWAY® cloning of the *MYB14* constructs for the promoter-reporter assay.

| Name                      | Primer sequence 5'-3'                                                                                                                                 |
|---------------------------|-------------------------------------------------------------------------------------------------------------------------------------------------------|
| Promoter of Hoe29         | Sense: 5' - 3'<br>GGGGACAAGTTTGTACAAAAAAGCAGGCTTCCTACTGACGTGCACTAGCCT<br>Antisense: 5' - 3'<br>GGGGACCACTTTGTACAAGAAAGCTGGGTCTTTTCTTCTCTATGTAAGGATTGA |
| Promoter of Ke83          | Sense: 5' - 3'<br>GGGGACAAGTTTGTACAAAAAAGCAGGCTTCCTACTGACGTGCACTAGCCT<br>Antisense: 5' - 3'<br>GGGGACCACTTTGTACAAGAAAGCTGGGTCTTTGAGACTGAGACACCCTTG    |
| Promoter of Augster Weiss | Sense: 5' - 3'<br>GGGGACAAGTTTGTACAAAAAAGCAGGCTTCCTACTGACGTGCACTAGCCT<br>Antisense: 5' - 3'<br>GGGGACCACTTTGTACAAGAAAGCTGGGTCTTTGAGACTGAGACACCCTTG    |
